# Supplementary material for: Epithelial Membrane Protein-2 (EMP2) Antibody Blockade Reduces Corneal Neovascularization in an In Vivo Model
Source: PubMed Central journal article supplement — Invest Ophthalmol Vis Sci. 2019 Jan;60(1):245–54. doi: 10.1167/iovs.18-24345 (PMC6336205; doi:10.1167/iovs.18-24345), 2019-01
Supplement: iovs-59-15-43_s01.pdf [file iovs-59-15-43_s01.pdf]

## Supplemental Figure 1

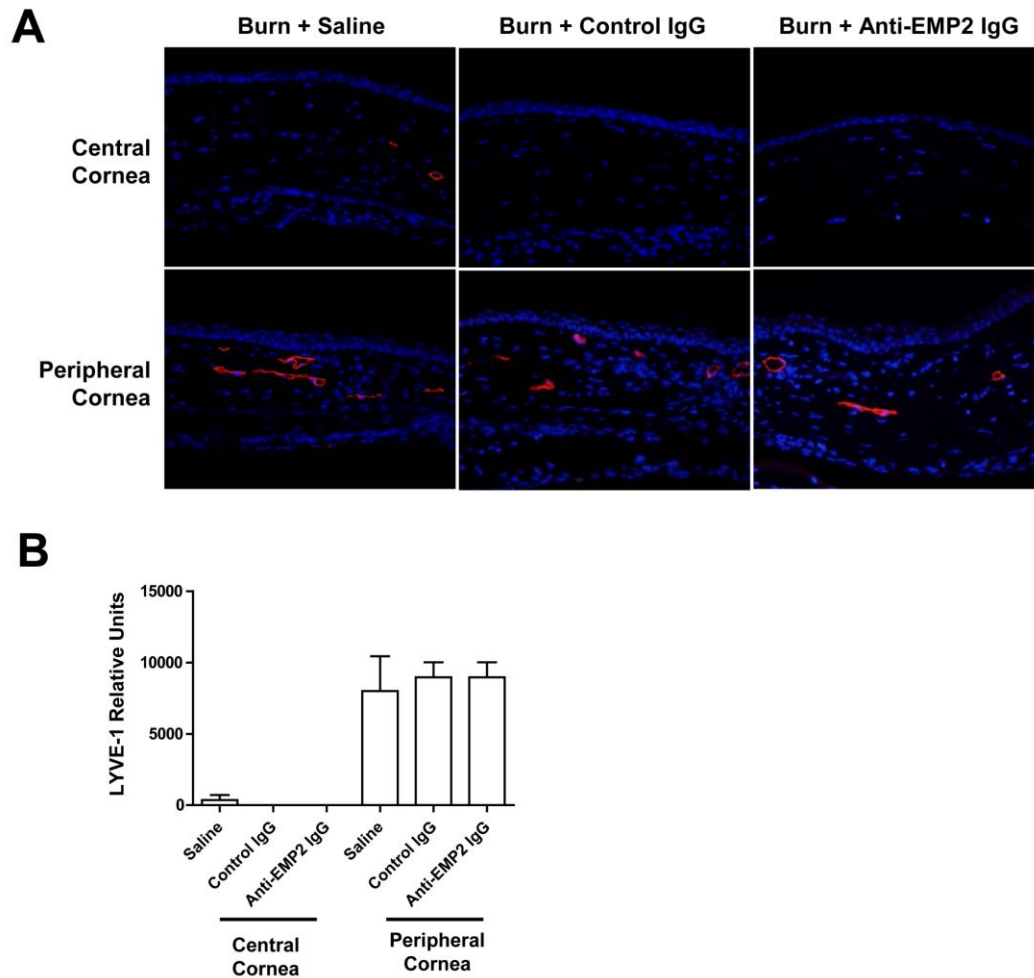

**Supplemental Fig 1. Anti-EMP2 treatment does not affect LYVE-1 expression in the central or peripheral cornea.**

(A, top panel) Little to no LYVE-1 staining was observed in the central areas of the burned corneas, regardless the type of treatment—saline, control IgG, or anti-EMP2 IgG. (A, bottom panel) Lymphatic vessel staining is present in the periphery of the cornea in the saline, control IgG, and anti-EMP2 treated groups, however, (C) upon quantitation, there is no statistical difference in the staining intensity of LYVE-1. The

LYVE-1 positive vessels stained with Alexa Fluor 594 were quantitated using Image J to determine relative staining units in each of the central and peripheral image regions.
